# Supplementary material for: Use of capillary Western immunoassay (Wes) for quantification of dystrophin levels in skeletal muscle of healthy controls and individuals with Becker and Duchenne muscular dystrophy
Source: PubMed Central journal article supplement (PMC5895072; doi:10.1371/journal.pone.0195850), 2018-04-11
Supplement: pone.0195850.s004.pdf [file pone.0195850.s004.pdf]

| Healthy control samples |         |     |            | BMD and DMD samples |               |         |                            |
|-------------------------|---------|-----|------------|---------------------|---------------|---------|----------------------------|
| Sample                  | Gender  | Age | Muscle     | Sample              | Muscle        | Age     | Deletion/Mutation          |
| Control0*               | male    | ~50 | Tibialis   | BMD1                | Tibialis      | 56      | unknown                    |
| Control1                | unknown | ~75 | Quadriceps | BMD2                | Tibialis      | 47      | del. 45-47                 |
| Control2                | unknown | ~75 | Quadriceps | BMD3                | Tibialis      | 48      | del. 45-48                 |
| Control3                | unknown | ~75 | Quadriceps | BMD4                | Tibialis      | 29      | Ex.19:c.2380+3A>C          |
| Control4                | unknown | ~75 | Quadriceps | BMD5                | Tibialis      | 51      | del. 45-55                 |
| Control5                | male    | 37  | Quadriceps | BMD6                | Tibialis      | 19      | del. 05                    |
| Control6                | male    | ~50 | Quadriceps | BMD7                | Tibialis      | 47      | del. 10-22                 |
| Control7                | male    | ~50 | Quadriceps | BMD8                | Tibialis      | 30      | Ex.26:c.3515G>A,p.Trp1172X |
| Control8                | male    | ~50 | Quadriceps | BMD9                | Tibialis      | 26      | del. 45-47                 |
| Control9                | male    | ~50 | Quadriceps | BMD10               | Tibialis      | unknown | Ex.29:c.3940C>T,p.Arg1314X |
| Control10               | male    | 67  | Quadriceps | BMD11               | Tibialis      | 63      | del. 45-47                 |
| Control11               | female  | 48  | Quadriceps | BMD12               | Tibialis      | 57      | del. 03-07                 |
| Control12               | male    | 53  | Quadriceps | BMD13               | Tibialis      | 47      | del. 45-47                 |
| Control13               | male    | 53  | Quadriceps | BMD14               | Tibialis      | 33      | del. 03-05                 |
| Control14               | male    | 47  | Quadriceps | BMD15               | Tibialis      | 39      | del. 45-47                 |
| Control15               | male    | 47  | Quadriceps | BMD16               | Tibialis      | unknown | unknown                    |
| Control16               | unknown | 61  | Tibialis   | BMD17               | Tibialis      | 37      | del. 45-47                 |
| Control17               | male    | ~50 | Tibialis   | BMD18               | Tibialis      | 51      | unknown                    |
| Control18               | male    | ~50 | Tibialis   | BMD19               | Tibialis      | 20      | del. 45-47                 |
| Control19               | male    | 69  | Tibialis   | BMD20               | Tibialis      | 31      | del. 03-04                 |
| Control20               | male    | 36  | Tibialis   | BMD21               | Tibialis      | 29      | del. 45-47                 |
| Control21               | male    | 49  | Tibialis   | BMD22               | Tibialis      | unknown | del. 48-49                 |
| Control22               | male    | 52  | Tibialis   | BMD23               | Tibialis      | 39      | del. 45-47                 |
| Control23               | male    | 57  | Tibialis   | BMD24               | Tibialis      | 51      | del.45-47                  |
| Control24               | female  | 39  | Tibialis   | BMD25               | Tibialis      | 31      | del. 45-47                 |
| Control25               | male    | 51  | Tibialis   | DMD1**              | Biceps        | 10      | del. 45                    |
| Control26               | female  | 36  | Tibialis   | DMD2                | Biceps        | 13      | del. 45-54                 |
| Control27               | male    | 30  | Tibialis   | DMD3                | Biceps        | 10      | del. 14-43 ##              |
| Control28               | female  | 28  | Tibialis   | DMD4                | Biceps        | 14      | del. 43 ##                 |
| Control29               | female  | 33  | Tibialis   | DMD5                | Gastrocnemius | 9       | del. 46-48                 |
| Control30               | male    | 66  | Tibialis   | DMD6                | Gastrocnemius | 11      | del. 44                    |
| Control31               | male    | 22  | Tibialis   | DMD7                | Gastrocnemius | 8       | del. 12-44 ##              |
|                         |         |     |            | DMD8                | Gastrocnemius | 8       | del. 46-53                 |
|                         |         |     |            | DMD9                | Gastrocnemius | 14      | del. 45-52                 |
|                         |         |     |            | DMD10#              | Gastrocnemius | 10      | del. 48-52                 |
|                         |         |     |            | DMD11               | Gastrocnemius | 7       | del. 45-52                 |
|                         |         |     |            | DMD12               | Gastrocnemius | 6       | del. 52                    |
|                         |         |     |            | DMD13               | paravertebral | 15      | del. 45                    |
|                         |         |     |            | DMD14               | unknown       | 16      | del. 45-50                 |
|                         |         |     |            | DMD15               | Tibialis      | 4       | del. 46-49                 |
|                         |         |     |            | DMD16               | Tibialis      | 7       | del. 52-54                 |
|                         |         |     |            | DMD17 <sup>s</sup>  | Tibialis      | 11      | del. 46-49                 |

\* healthy reference control (used for calibration curves and spiking)

\*\* 'DMD high' in validation experiments

# 'DMD low' in validation experiments

\$ DMD used for spiking experiments

## lacks Mandys106 epitope
