# Supplementary material for: Use of capillary Western immunoassay (Wes) for quantification of dystrophin levels in skeletal muscle of healthy controls and individuals with Becker and Duchenne muscular dystrophy
Source: PubMed Central journal article supplement (PMC5895072; doi:10.1371/journal.pone.0195850), 2018-04-11
Supplement: pone.0195850.s005.pdf [file pone.0195850.s005.pdf]

| <b>antibody</b> | <b>Optimal antibody dilution</b> | <b>Linear range loading conc. healthy control</b> | <b>Linear range loading conc DMD</b> | <b>Selected standard loading concentration</b> |
|-----------------|----------------------------------|---------------------------------------------------|--------------------------------------|------------------------------------------------|
| ab154168        | 1/1000<br>(0.28 µg/ml)           | 0.2 - 100 µg/ml<br>(500-fold)                     | 31.3 – 300 µg/ml                     | 25 µg/ml (healthy control)<br>250 µg/ml (DMD)  |
| Mandys106       | 1/50<br>(20 µg/ml)               | 3.1 - 200 µg/ml<br>(60-fold)                      | 31.3 – 400 µg/ml                     | 25 µg/ml (healthy control)<br>250 µg/ml (DMD)  |
| α-actinin       | 1/100<br>(14.2 µg/ml)            | 0 - 5 µg/ml (healthy control & DMD)               |                                      | 2.5 µg/ml<br>(healthy control & DMD)           |
